# Supplementary material for: Analysis of Mortality in Intracerebral Hemorrhage Patients with Hyperacute Ischemic Stroke Treated Using Thrombolytic Therapy: A Nationwide Population-based Cohort Study in South Korea
Source: MDPI journal article supplement (doi:10.3390/jpm12081260), 2022-07-30
Supplement: s1 [file s1]

**Supplementary Table S1. Definitions of comorbidities defined using ICD-10 codes**

| <b>Comorbidity</b>          | <b>ICD-10 code</b>                        |
|-----------------------------|-------------------------------------------|
| Hypertension                | I10-I13, I15                              |
| Diabetes mellitus           | E10-E14                                   |
| Dyslipidemia                | E78                                       |
| Acute myocardial infarction | I21, I22                                  |
| Congestive heart failure    | I11, I13.0, I13.2, I50, J81               |
| Atrial fibrillation         | I48                                       |
| Peripheral vascular disease | I73, I77.1                                |
| Ischemic stroke             | I63, I64                                  |
| Hemorrhagic stroke          | I60-I62                                   |
| Chronic kidney disease      | I12.0, I13.1, N18, N19, Z49, Z94.0, Z99.2 |
| Liver cirrhosis             | K70.2, K70.3, K74                         |
| Cancer                      | C00-C99                                   |
| COPD                        | J44                                       |

ICD-10=International Classification of Diseases, 10th Revision; COPD=chronic obstructive pulmonary disease.

\* Comorbidities were defined as having two or more of the same diagnostic codes for three years before the index date.

**Supplementary Table S2. Univariable analysis of attributing factors for 1-month mortality**

|                                         | Survival<br>(n=41,044) | Death<br>(n=9,506) | P-value* |
|-----------------------------------------|------------------------|--------------------|----------|
| <i>ICH group, n (%)</i>                 | 1,865 (4.1)            | 702 (15.0)         | <0.001   |
| <i>Age, median [25–75th percentile]</i> | 68 [59-75]             | 73 [65-78]         | <0.001   |
| <i>Sex, n (%)</i>                       |                        |                    | <0.001   |
| Male                                    | 28,878 (63.0)          | 2,388 (51.0)       |          |
| Female                                  | 16,990 (37.0)          | 2,294 (49.0)       |          |
| <i>Comorbidities, n (%)</i>             |                        |                    |          |
| Hypertension                            | 27,928 (60.9)          | 3,476 (74.2)       | <0.001   |
| Diabetes mellitus                       | 14,216 (31.0)          | 1,784 (38.1)       | <0.001   |
| Dyslipidemia                            | 19,589 (42.7)          | 2,199 (47.0)       | <0.001   |
| Acute myocardial infarction             | 1,151 (2.5)            | 208 (4.4)          | <0.001   |
| Congestive heart failure                | 8,375 (18.3)           | 1,405 (30.0)       | <0.001   |
| Atrial fibrillation                     | 6,517 (14.2)           | 1,026 (21.9)       | <0.001   |
| Peripheral vascular disease             | 7,080 (15.4)           | 848 (18.1)         | <0.001   |
| Ischemic stroke                         | 6,771 (14.8)           | 886 (18.9)         | <0.001   |
| Hemorrhagic stroke                      | 309 (0.7)              | 41 (0.9)           | 0.135    |
| Chronic kidney disease                  | 1,316 (2.9)            | 268 (5.7)          | <0.001   |
| Liver cirrhosis                         | 424 (0.9)              | 53 (1.1)           | 0.187    |
| Cancer                                  | 3,702 (8.1)            | 493 (10.5)         | <0.001   |
| COPD                                    | 2,663 (5.8)            | 384 (8.2)          | <0.001   |

\*Wilcoxon rank-sum test was performed for continuous variables. The chi-squared test was used for categorical variables. ICH, intracerebral hemorrhage; COPD, chronic obstructive pulmonary disease

**Supplementary Table S3. Univariable analysis of attributing factors for 3-month mortality**

|                                         | Survival<br>(n=41,044) | Death<br>(n=9,506) | P-value* |
|-----------------------------------------|------------------------|--------------------|----------|
| <i>ICH group, n (%)</i>                 | 1,714 (3.9)            | 853 (13.4)         | <0.001   |
| <i>Age, median [25–75th percentile]</i> | 68 [58-75]             | 74 [66-79]         | <0.001   |
| <i>Sex, n (%)</i>                       |                        |                    | <0.001   |
| Male                                    | 27,905 (63.2)          | 3,361 (52.8)       |          |
| Female                                  | 16,274 (36.8)          | 3,010 (47.2)       |          |
| <i>Comorbidities, n (%)</i>             |                        |                    |          |
| Hypertension                            | 26,656 (60.3)          | 4,748 (74.5)       | <0.001   |
| Diabetes mellitus                       | 13,546 (30.7)          | 2,454 (38.5)       | <0.001   |
| Dyslipidemia                            | 18,853 (42.7)          | 2,935 (46.1)       | <0.001   |
| Acute myocardial infarction             | 1,079 (2.4)            | 280 (4.4)          | <0.001   |
| Congestive heart failure                | 7,867 (17.8)           | 1,913 (30.0)       | <0.001   |
| Atrial fibrillation                     | 6,194 (14.0)           | 1,349 (21.2)       | <0.001   |
| Peripheral vascular disease             | 6,782 (15.4)           | 1,146 (18.0)       | <0.001   |
| Ischemic stroke                         | 6,389 (14.5)           | 1,268 (19.9)       | <0.001   |
| Hemorrhagic stroke                      | 286 (0.6)              | 64 (1.0)           | 0.002    |
| Chronic kidney disease                  | 1,207 (2.7)            | 377 (5.9)          | <0.001   |
| Liver cirrhosis                         | 394 (0.9)              | 83 (1.3)           | <0.001   |
| Cancer                                  | 3,406 (7.7)            | 789 (12.4)         | <0.001   |
| COPD                                    | 2,442 (5.5)            | 605 (9.5)          | <0.001   |

\*Wilcoxon rank-sum test was performed for continuous variables. The chi-squared test was used for categorical variables. ICH, intracerebral hemorrhage; COPD, chronic obstructive pulmonary disease

**Supplementary Table S4. Univariable analysis of attributing factors for 6-month mortality**

|                                         | Survival<br>(n=41,044) | Death<br>(n=9,506) | P-value* |
|-----------------------------------------|------------------------|--------------------|----------|
| <i>ICH group, n (%)</i>                 | 1,608 (3.8)            | 959 (12.4)         | <0.001   |
| <i>Age, median [25–75th percentile]</i> | 67 [58-75]             | 74 [67-79]         | <0.001   |
| <i>Sex, n (%)</i>                       |                        |                    | <0.001   |
| Male                                    | 27,178 (63.4)          | 4,088 (53.1)       |          |
| Female                                  | 15,668 (36.6)          | 3,616 (46.9)       |          |
| <i>Comorbidities, n (%)</i>             |                        |                    |          |
| Hypertension                            | 25,637 (59.8)          | 5,767 (74.9)       | <0.001   |
| Diabetes mellitus                       | 13,013 (30.4)          | 2,987 (38.8)       | <0.001   |
| Dyslipidemia                            | 18,229 (42.5)          | 3,559 (46.2)       | <0.001   |
| Acute myocardial infarction             | 1,017 (2.4)            | 342 (4.4)          | <0.001   |
| Congestive heart failure                | 7,436 (17.4)           | 2,344 (30.4)       | <0.001   |
| Atrial fibrillation                     | 5,884 (13.7)           | 1,659 (21.5)       | <0.001   |
| Peripheral vascular disease             | 6,508 (15.2)           | 1,420 (18.4)       | <0.001   |
| Ischemic stroke                         | 6,064 (14.2)           | 1,593 (20.7)       | <0.001   |
| Hemorrhagic stroke                      | 275 (0.6)              | 75 (1.0)           | 0.002    |
| Chronic kidney disease                  | 1,111 (2.6)            | 473 (6.1)          | <0.001   |
| Liver cirrhosis                         | 376 (0.9)              | 101 (1.3)          | <0.001   |
| Cancer                                  | 3,210 (7.5)            | 985 (12.8)         | <0.001   |
| COPD                                    | 2,278 (5.3)            | 769 (10.0)         | <0.001   |

\*Wilcoxon rank-sum test was performed for continuous variables. The chi-squared test was used for categorical variables. ICH, intracerebral hemorrhage; COPD, chronic obstructive pulmonary disease
